# Supplementary material for: Strategic design of binary transition metal sulfides for superior asymmetric supercapacitors
Source: Royal Society of Chemistry journal article supplement (doi:10.1039/d5ma00052a), 2025-01-01

# Strategic Design of Binary Transition Metal Sulfides for Superior Asymmetric Supercapacitors

Junaid Khan<sup>a, b, \*\*</sup>, A. Ahmed<sup>c</sup>, Abdullah A. Al-Kahtani<sup>d</sup>

<sup>a</sup>Department of Physics, Government Postgraduate Collage No.1, Abbottabad, Khyber Pakhtunkhwa, Pakistan

<sup>b</sup>Department Of Higher Education Achieves and Libraries, Government of Khyber Pakhtunkhwa, Pakistan

<sup>c</sup>Department of Chemical and Bilogical Engineering, Gachon University, 1342 Seongnam-daero, Seongnam13120, Republic of Korea

<sup>d</sup>Chemistry Department, Collage of Science, King Saud University, P. O. Box 2455, Riyadh-22451, Saudi Arabia

\*\*Email: junaidkhan.nanotech@gmail.com

Figure S1: XRD of all the synthesized samples.

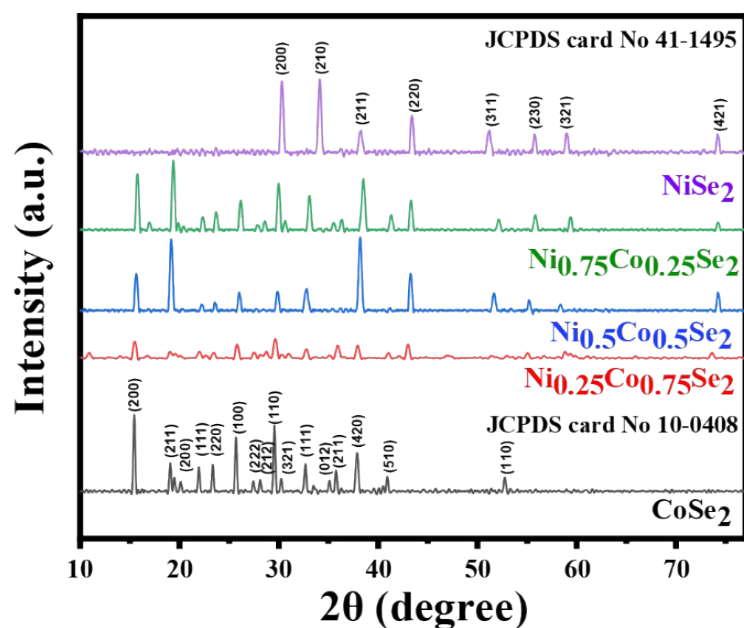

Figure S2: EDX of S1.

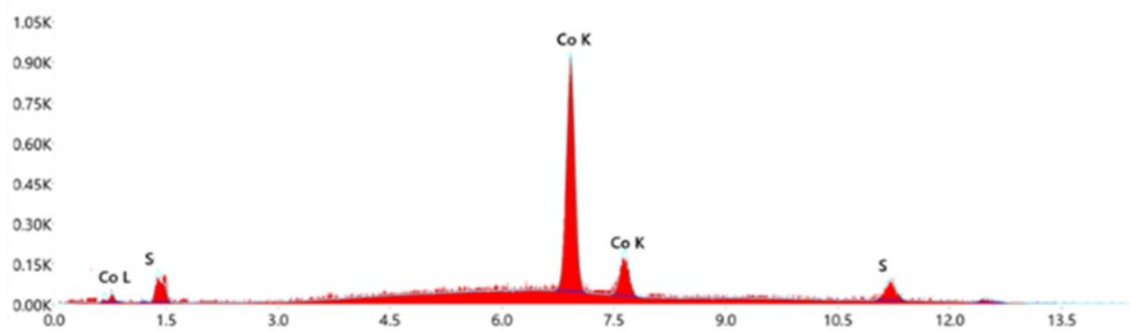

Figure S3: EDX of S2.

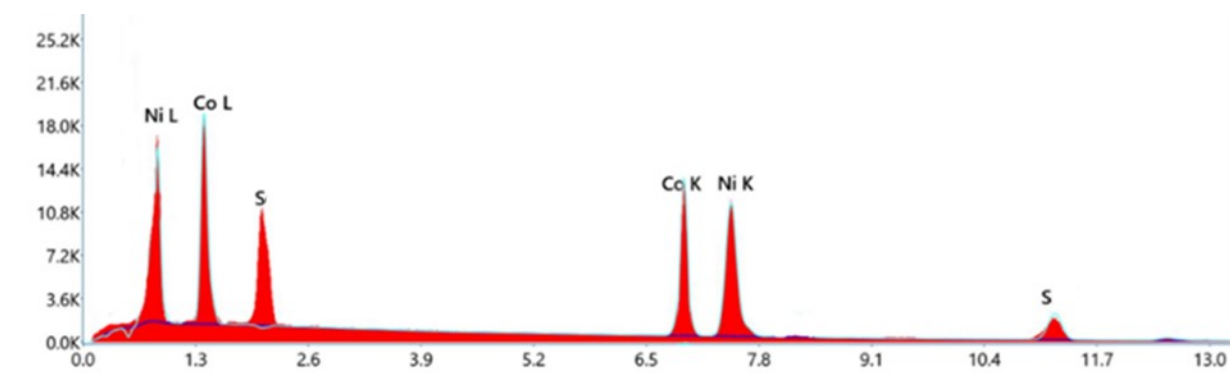

Figure S4: EDX of S3.

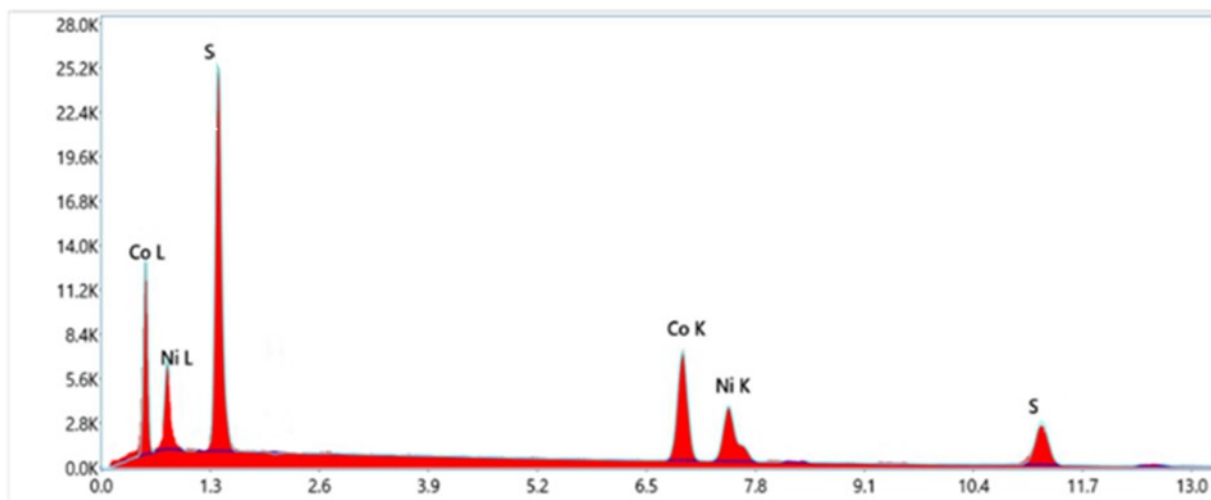

Figure S5: EDX of S4.

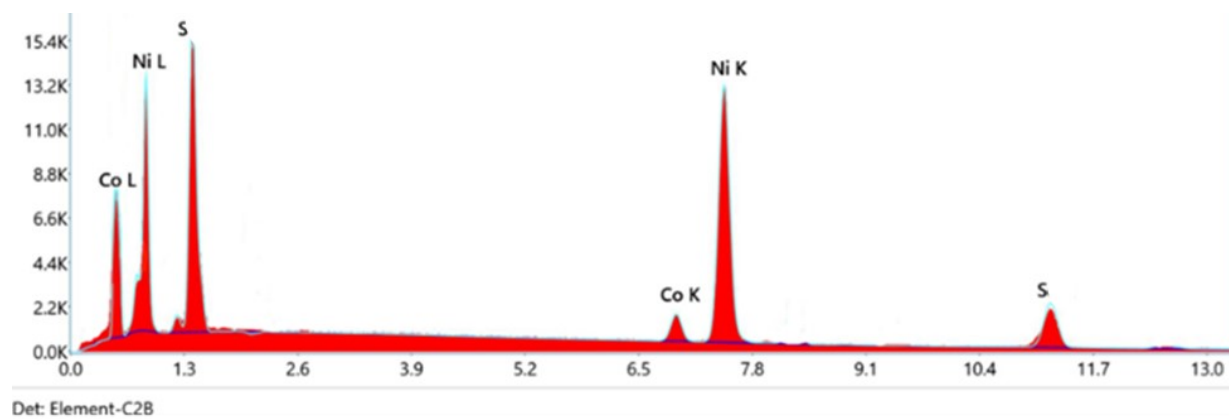

*Figure S6: EDX of S5.*

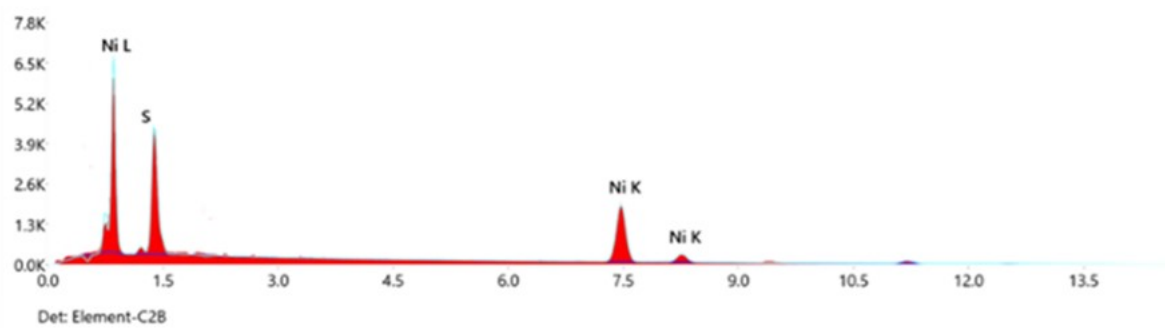

Figure S7: Nitrogen adsorption-desorption isotherms all the samples.

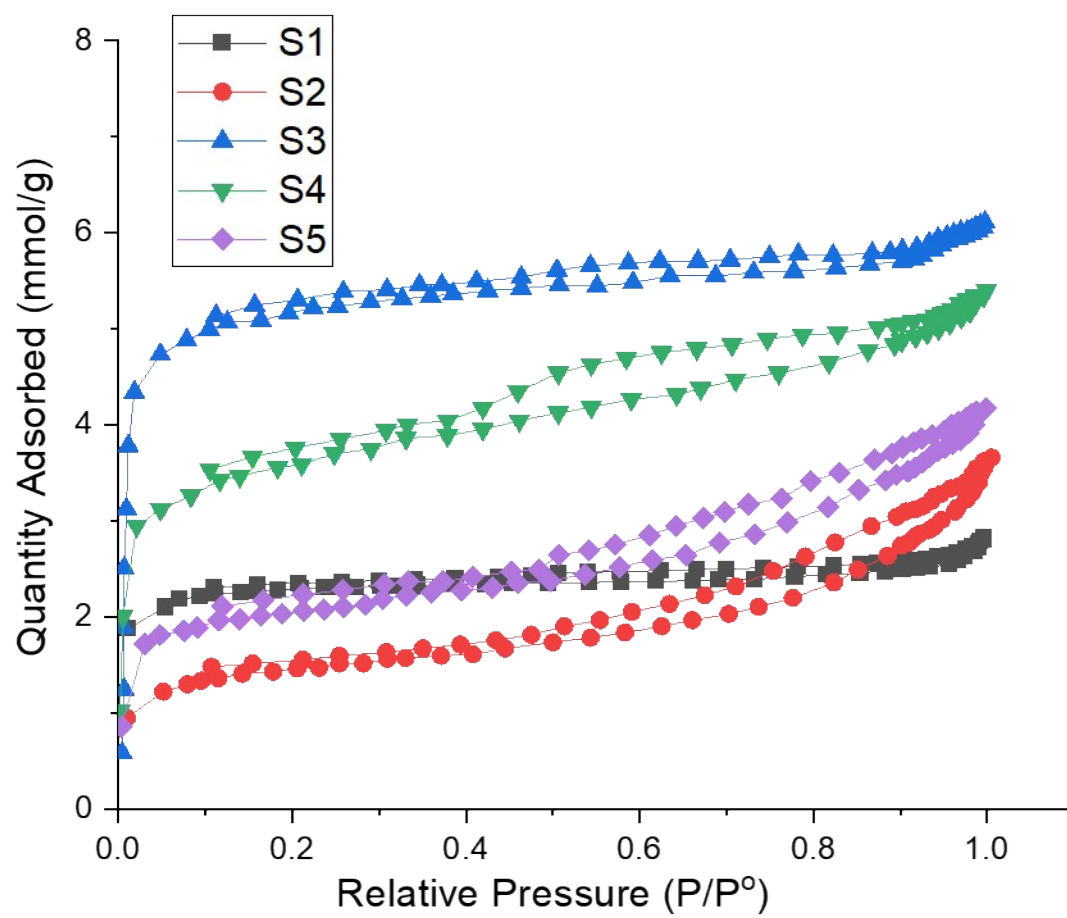

Supplement: d5ma00052a1.pdf [file d5ma00052a1.pdf]
